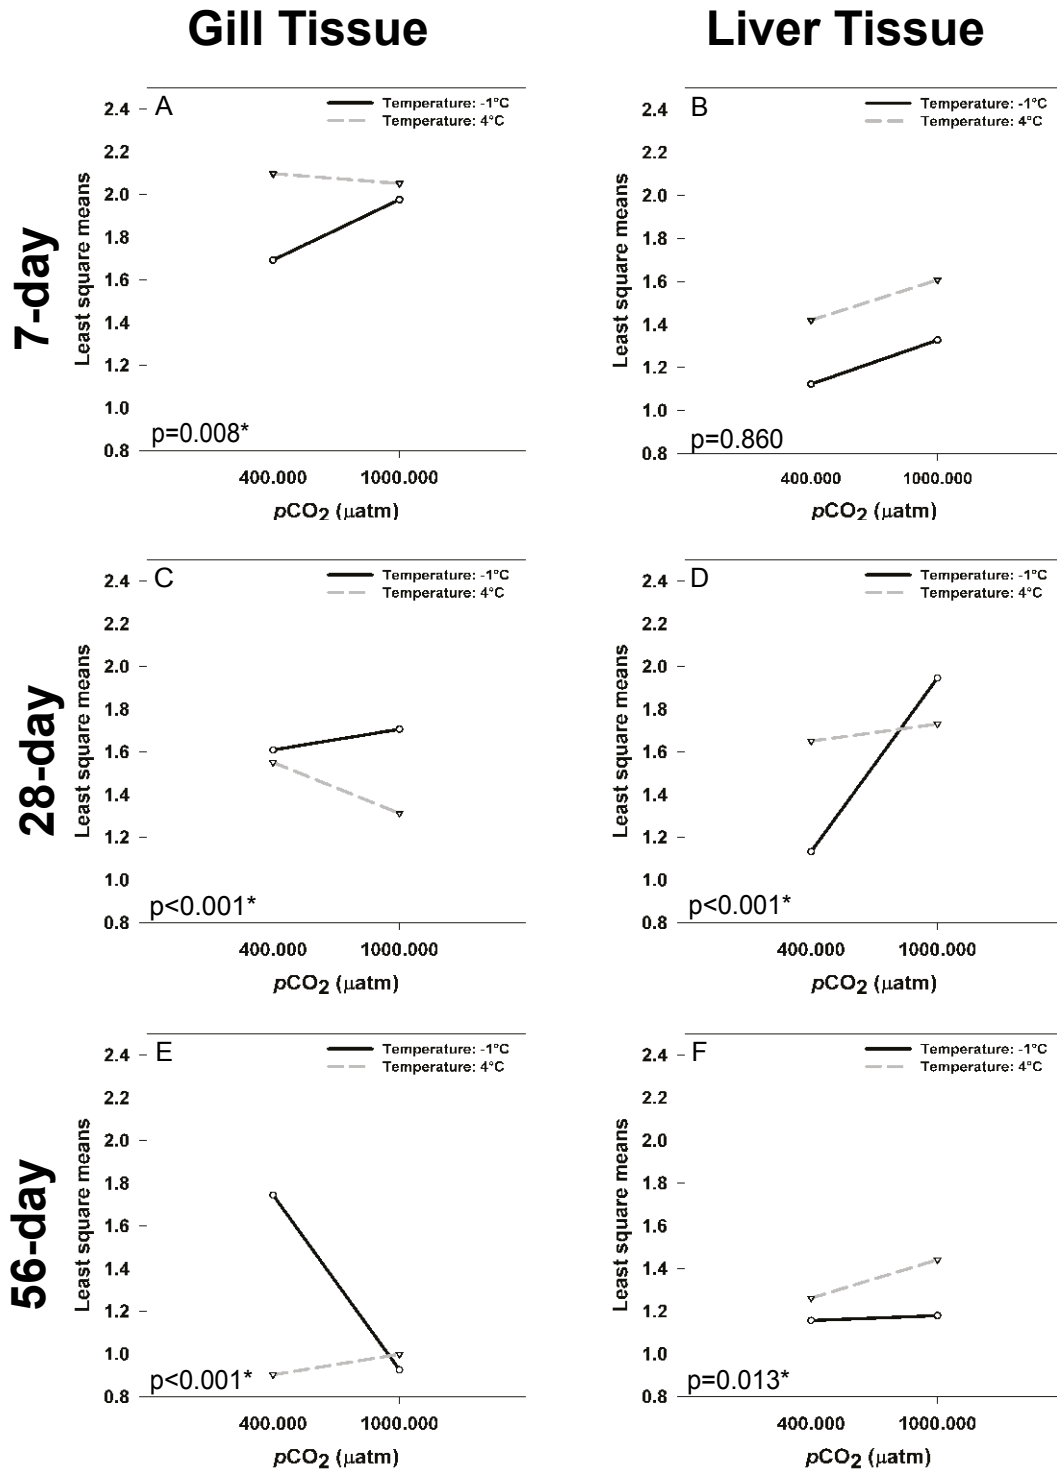

**Fig. S1.** Protein carbonyl interaction plots of *T. bernacchii* gill and liver tissues acclimated for 7 days (gill: A, liver: B), 28 days (gill: C, liver: D), and 56-days (gill: E, liver: F).

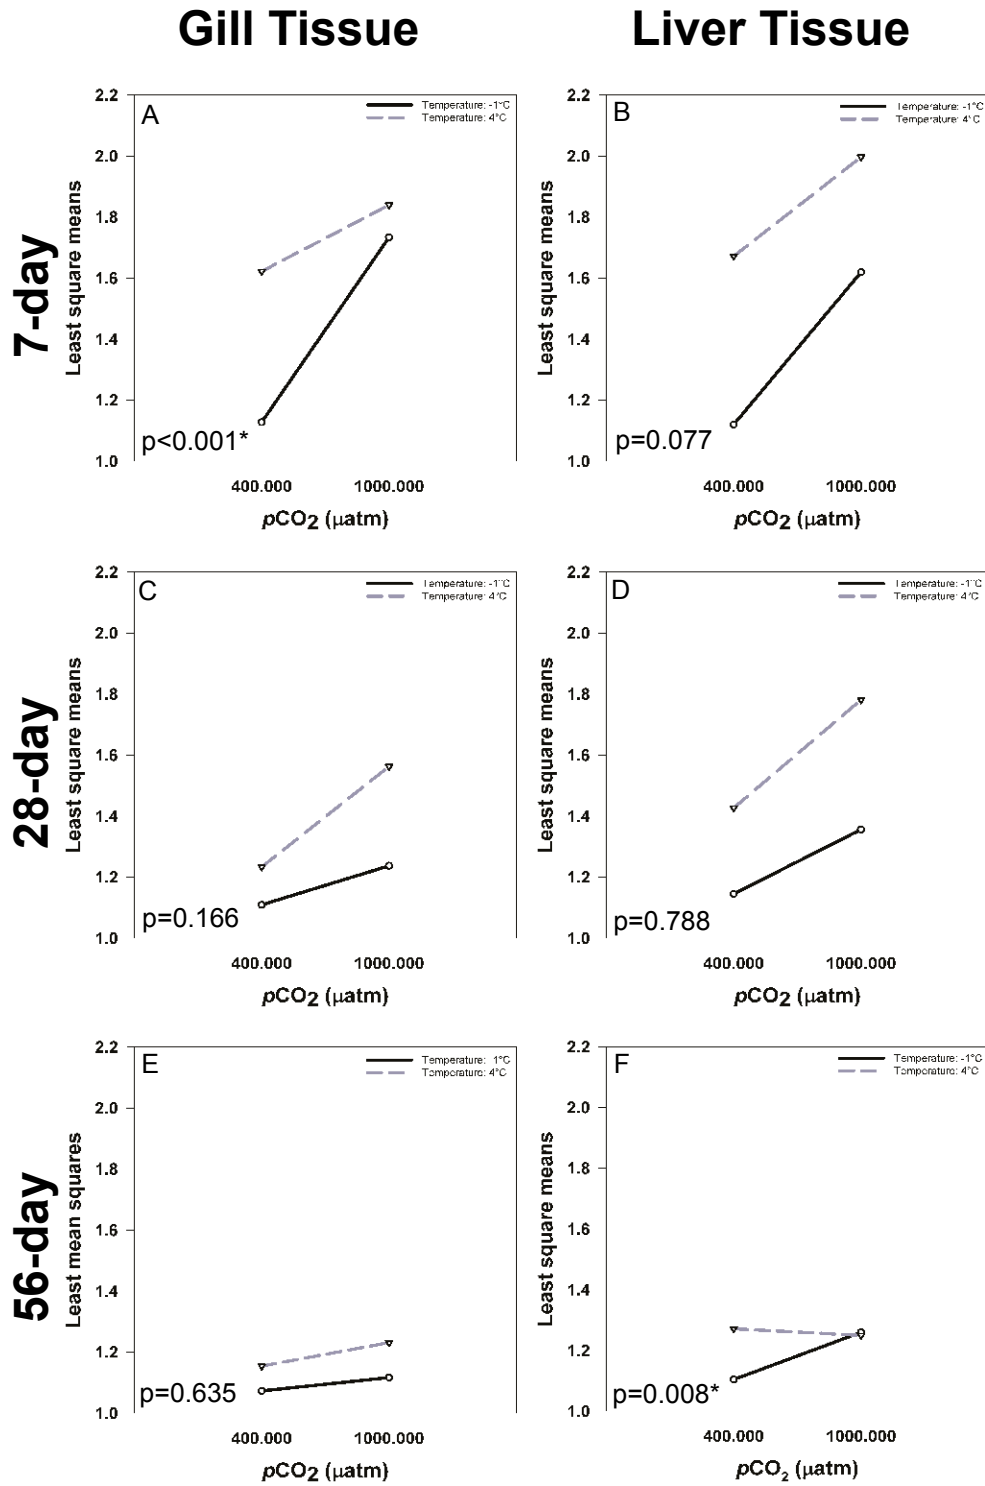

**Fig. S2.** Protein carbonyl interaction plots of *P. borchgrevinki* gill and liver tissues acclimated for 7 days (gill: A, liver: B), 28 days (gill: C, liver: D), and 56 days (gill: E, liver: F).

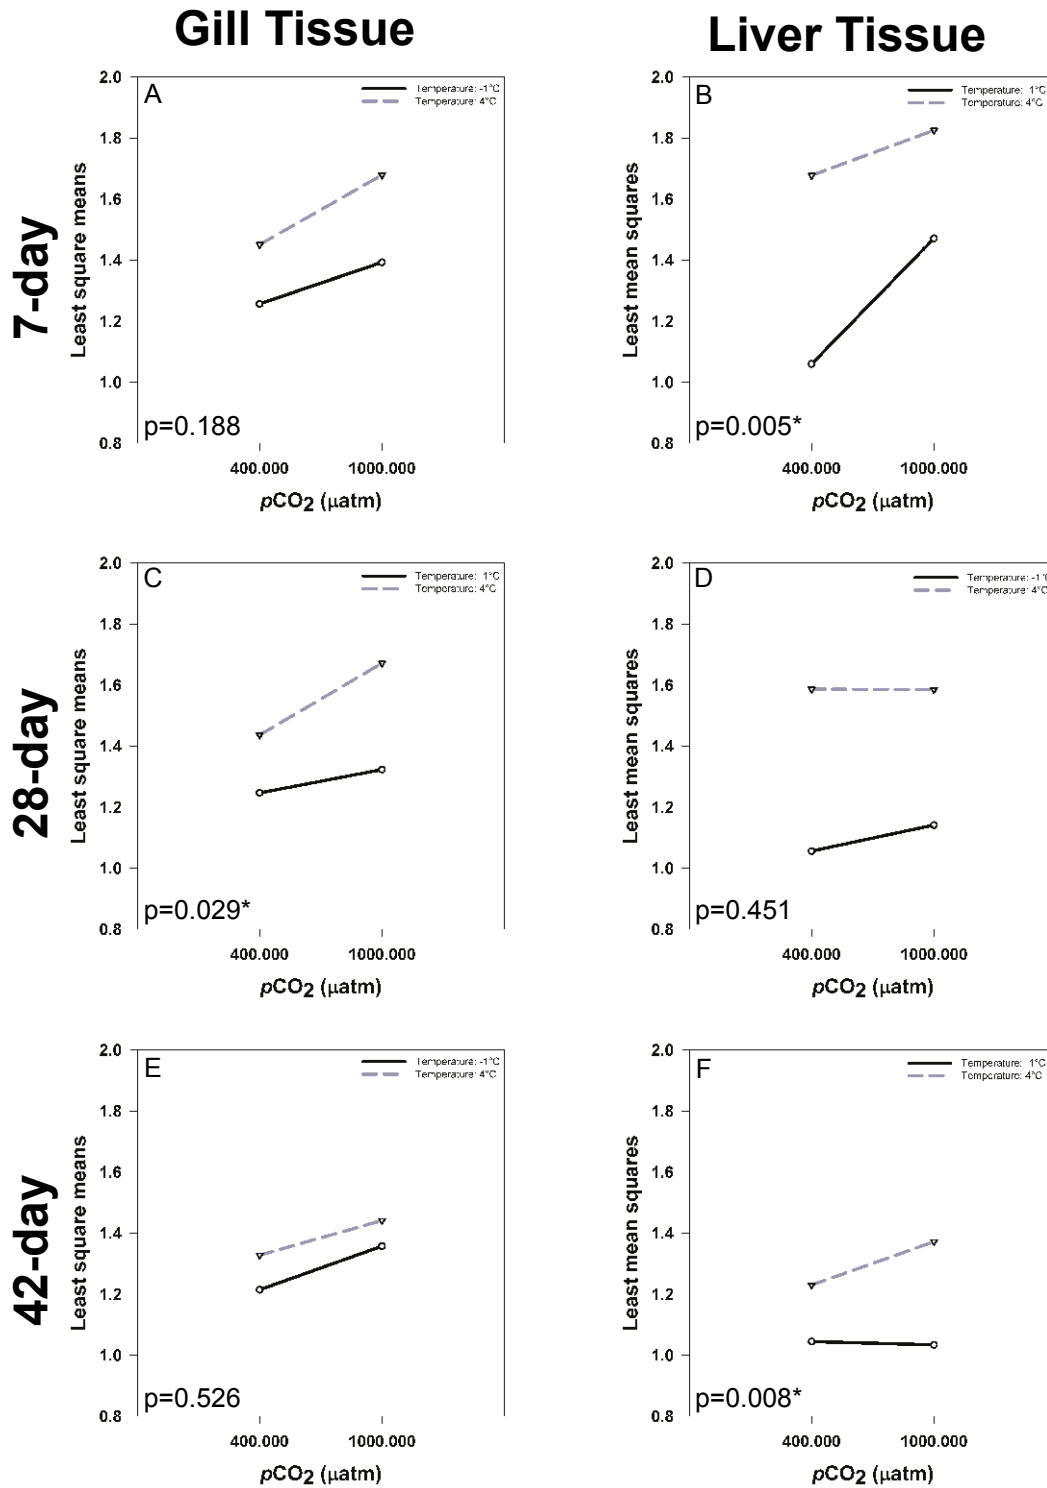

**Fig. S3.** Protein carbonyl interaction plots of *T. newnesi* gill and liver tissues acclimated for 7 days (gill: A, liver: B), 28 days (gill: C, liver: D), and 42 days (gill: E, liver: F).
